# Supplementary material
Source: ML conference proceedings conference paper supplement (https://openreview.net/forum?id=ZaKGh4wP87)

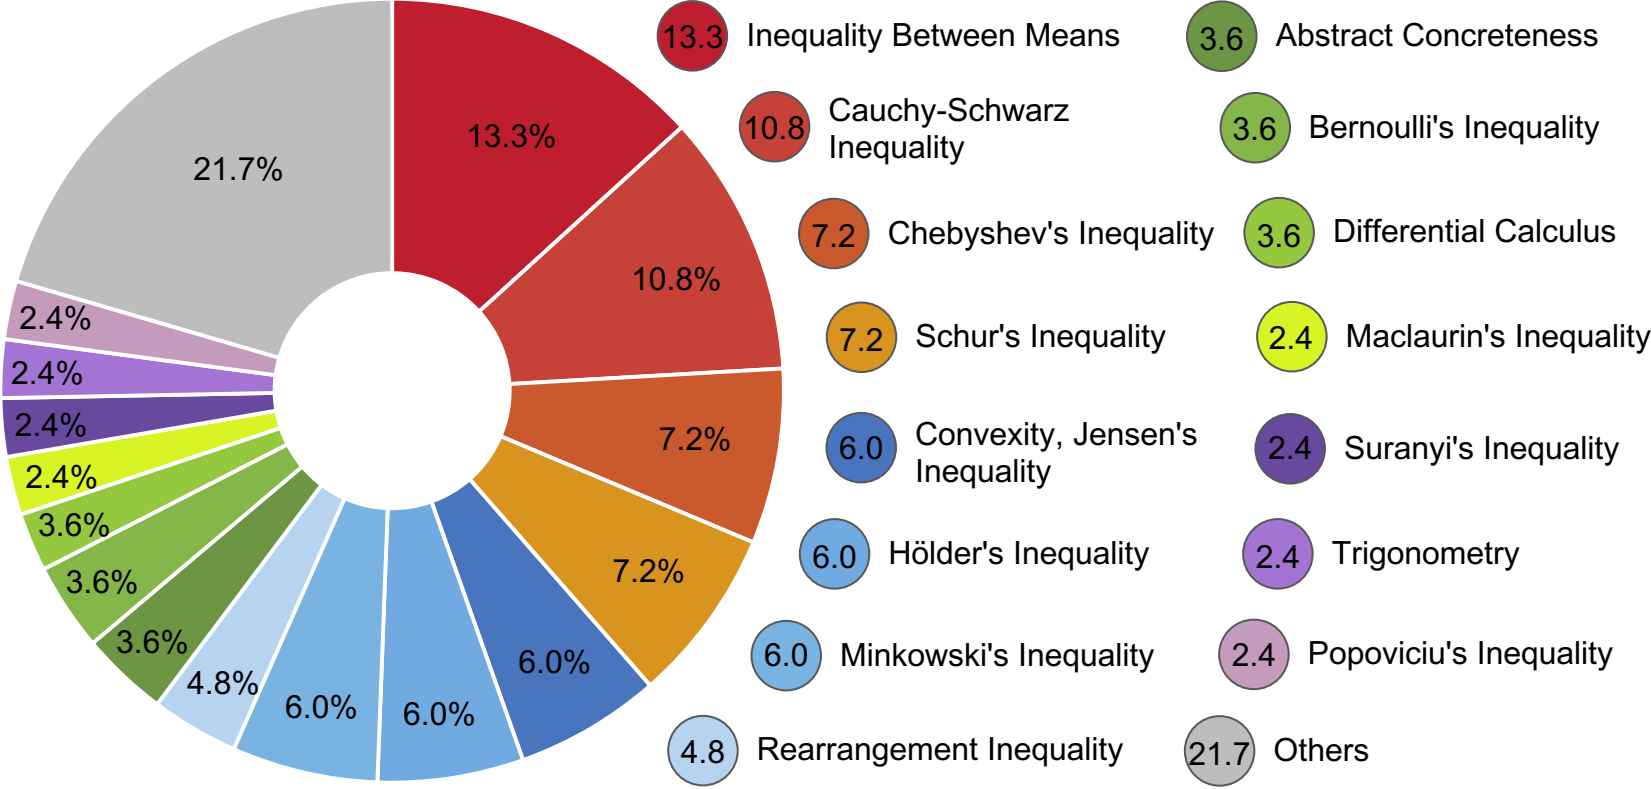

Supplement: supplementary_material [file theorem_category_pie_chart.pdf › code/assets/theorem_category_pie_chart.pdf]
